# Supplementary material for: Jammed elastic shells – a 3D experimental soft frictionless granular system
Source: Royal Society of Chemistry journal article supplement (doi:10.1039/c4sm02098g), 2015-01-01
Supplement: c4sm02098g1.pdf [file c4sm02098g1.pdf]

# Jammed elastic shells - a 3D experimental soft frictionless granular system<sup>†</sup>

Jissy Jose,<sup>\*a</sup> Gerhard A. Blab,<sup>b‡</sup> Alfons van Blaaderen and Arnout Imhof<sup>a</sup>

Received Xth XXXXXXXXXX 20XX, Accepted Xth XXXXXXXXXX 20XX

First published on the web Xth XXXXXXXXXX 200X

DOI: 10.1039/b000000x

## 1 Supporting Information

**Atomic force microscopy (AFM)** The thickness of the shell was measured using Atomic Force Microscopy (AFM, Digital Instrument, Nanoscope) in tapping mode. Samples for AFM were prepared by applying a drop of a suspension of the shells in ethanol (after removing the PDMS core) onto a glass cover slide. The collapse of the shells, due to drying, leads to plateaus in the height profile that correspond to twice the thickness of the shell.

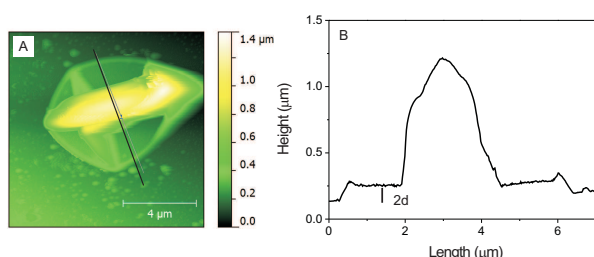

**Fig. S1** (A) AFM image of a dried shell, after removing the PDMS core by washing with ethanol. (B) The height profile taken along the line drawn through the collapsed capsules shows plateaus from which we obtained a shell thickness of  $d = 56$  nm.

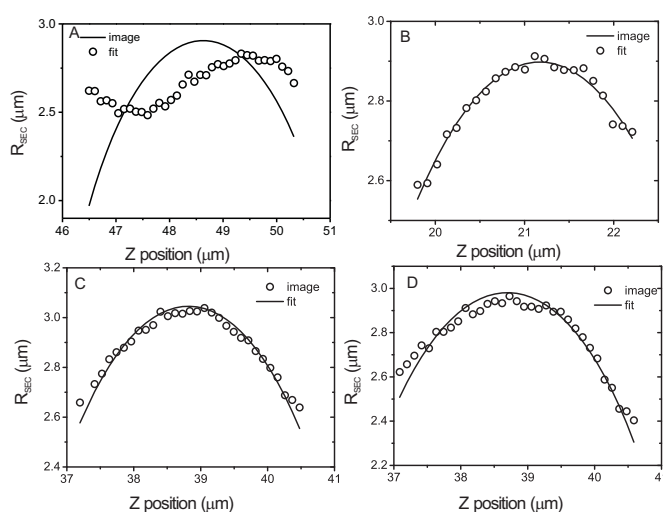

**Fig. S2** Plots of radius of smallest enclosing circle  $R_{SEC}$  as a function of position along  $Z$  for (A) a typical ambiguous particle and particles containing (B) 2, (C) 6 and (D) 10 dimples. Except for the ambiguous particle, the data points obtained from image analysis (circles) are nicely fitted (line) by the equation of a circle,  $R_{SEC}^2 = R_t^2 - (Z - Z_c)^2$ .

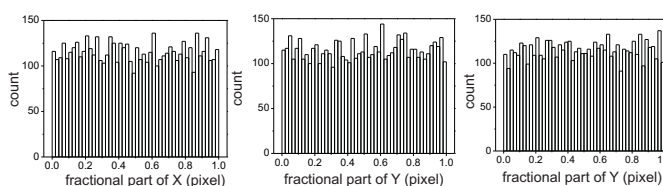

**Fig. S3** Distribution of the fractional part of the particle coordinates  $X_c$ ,  $Y_c$  and  $Z_c$  found using the image analysis routine in an image volume  $99.94 \times 99.94 \times 66 \mu\text{m}^3$ . The histograms are almost flat in all three graphs which is a clear indication that particles are located with sub-pixel resolution.
